# Supplementary material
Source: publisher site journal article supplement (https://www.dovepress.com/article/593442)
Supplement: Supplementary file 1 [file 593442%20Supplementary%20Material.docx]

Table S1. CSHQ subscale scores of the participants*

| Variables | Total  n=1589 | duration≤9h  n=423 | 9<duration≤10h  n=976 | duration>10h  n=190 |
| --- | --- | --- | --- | --- |
| Bedtime resistance | 11.67 (2.38) | 11.96 (2.37) | 11.60 (2.38) | 11.38 (2.37) |
| Sleep anxiety | 7.33 (1.77) | 7.40 (1.88) | 7.33 (1.72) | 7.17 (1.74) |
| Sleep duration | 4.80 (1.52) | 5.33 (1.55) | 4.65 (1.48) | 4.37 (1.40) |
| Sleep disordered breathing | 3.19 (0.57) | 3.17 (0.59) | 3.19 (0.58) | 3.18 (0.49) |
| Parasomnias | 7.96 (1.38) | 8.03 (1.45) | 7.96 (1.38) | 7.85 (1.21) |
| Daytime sleepiness | 11.84 (2.53) | 11.97 (2.69) | 11.90 (2.48) | 11.24 (2.32) |
| Night waking | 3.31 (0.72) | 3.37 (0.82) | 3.29 (0.70) | 3.24 (0.57) |
| Sleep onset delay | 1.77 (0.74) | 1.90 (0.80) | 1.73 (0.71) | 1.71 (0.71) |

Abbreviation: CSHQ, children’s sleep habits questionnaire

* values are mean±SD.

Table S2. Comparison of nighttime sleep duration and anxiety symptoms for threshold at 8.5ha

| Variables | total  n=1,589 | duration≤8.5h  n=83 | 8.5<duration≤9.5h  n=904 | duration>9.5h  n=602 | *H* | *P*b |
| --- | --- | --- | --- | --- | --- | --- |
| total PAS | 19(10, 29) | 21(10, 34) | 19(10, 29) | 18(9, 29) | 3.039 | 0.219 |
| SAD | 4(2, 6) | 4(2, 6) | 4(2, 6) | 4(2, 6) | 0.015 | 0.992 |
| PIF | 6(3, 9) | 8(3, 11) | 6(3, 9) | 6(3, 9) | 5.345 | 0.069 |
| SP | 4(1, 7) | 4(1, 8) | 4(1, 7) | 4(1, 7) | 1.955 | 0.376 |
| OCD | 2(0, 4) | 2(0, 4) | 2(0, 4) | 2(0, 4) | 1.535 | 0.464 |
| GAD | 3(1, 5) | 3(1, 5) | 3(1, 5) | 2(1, 5) | 4.108 | 0.128 |

Abbreviations: PAS, preschool anxiety scale; SAD, separation anxiety disorder; PI, physical injury fears; SP, social phobia; OCD, obsessive-compulsive disorder; GAD, generalized anxiety disorder.

a.Values are median (p25, p75);

b.Performed by Kruskal-Wallis equality-of-populations rank test.

Table S3. Comparison of nighttime sleep duration and anxiety symptoms for threshold at 9.5ha

| Variables | total  n=1,589 | duration≤9.5h  n=987 | 9.5<duration≤10.5h  n=563 | duration>10.5h  n=39 | *H* | *P*b |
| --- | --- | --- | --- | --- | --- | --- |
| total PAS | 19(10, 29) | 19(10, 29) | 19(10, 29) | 15(7, 25) | 3.320 | 0.190 |
| SAD | 4(2, 6) | 4(2, 6) | 4(2, 6) | 3(2, 5) | 1.525 | 0.467 |
| PIF | 6(3, 9) | 6(3, 9) | 6(3, 9) | 5(2, 7) | 2.463 | 0.292 |
| SP | 4(1, 7) | 4(1, 7) | 4(1, 7) | 3(1, 6) | 3.511 | 0.173 |
| OCD | 2(0, 4) | 2(0, 4) | 2(0, 4) | 2(0, 3) | 1.200 | 0.549 |
| GAD | 3(1, 5) | 3(1, 5) | 2(1, 5) | 2(0, 4) | 4.517 | 0.105 |

Abbreviations: PAS, preschool anxiety scale; SAD, separation anxiety disorder; PI, physical injury fears; SP, social phobia; OCD, obsessive-compulsive disorder; GAD, generalized anxiety disorder.

a.Values are median (p25, p75);

b.Performed by Kruskal-Wallis equality-of-populations rank test.

Table S4. Comparison of weekday nighttime sleep duration and anxiety symptomsa.

| Variables | total  n=1,589 | duration≤9h  n=623 | 9<duration≤10h  n=760 | duration>10h  n=206 | *H* | *P*b |
| --- | --- | --- | --- | --- | --- | --- |
| total PAS | 19(10, 29) | 20(11, 30) | 18(9, 29) | 17.5(8, 27) | 8.061 | 0.018 |
| SAD | 4(2, 6) | 4(2, 6) | 4(2, 6) | 3.5(1, 5) | 2.038 | 0.361 |
| PIF | 6(3, 9) | 6(3, 10) | 6(3, 9) | 5(2, 8) | 5.253 | 0.072 |
| SP | 4(1, 7) | 5(2, 7) | 4(1, 7) | 3(1, 7) | 7.778 | 0.021 |
| OCD | 2(0, 4) | 2(0, 4) | 2(0, 4) | 2(0, 4) | 3.256 | 0.196 |
| GAD | 3(1, 5) | 3(1, 5) | 3(1, 5) | 2(0, 5) | 7.922 | 0.019 |

Abbreviations: PAS, preschool anxiety scale; SAD, separation anxiety disorder; PIF, physical injury fears; SP, social phobia; OCD, obsessive-compulsive disorder; GAD, generalized anxiety disorder.

a.Values are median (p25, p75);

b.Performed by Kruskal-Wallis equality-of-populations rank test.

Table S5. LMM analysis of weekday nighttime sleep duration on anxiety symptoms.

| PAS scores |  | Univariate Analysis | | | | | | |  |  | Multivariate Analysis* | | | | |
| --- | --- | --- | --- | --- | --- | --- | --- | --- | --- | --- | --- | --- | --- | --- | --- |
| *β* | 95% CI | | | *z* | | *P* | |  | *β* | | 95% CI | | *z* | *P* |
| PAS total score |  |  | |  | | | | | | | | | | | |
| duration>10h(n=206) | Reference group | | | | | | | |  | Reference group | | | | | |
| 9<duration≤10h(n=760) | 0.77 | | -1.40, 2.95 | | | 0.70 | | 0.487 |  | 0.83 | | | -1.50, 3.17 | 0.70 | 0.483 |
| duration≤9h(n=623) | 2.42 | | 0.46, 4.37 | | | 2.42 | | 0.015 |  | 2.51 | | | 0.43, 4.59 | 2.37 | 0.018 |
| SAD |  | |  | | |  | |  |  |  | | |  |  |  |
| duration>10h(n=206) | Reference group | | | | | | | |  | Reference group | | | | | |
| 9<duration≤10h(n=760) | 0.12 | | -0.33, 0.56 | | | 0.52 | | 0.606 |  | 0.16 | | | -0.31, 0.63 | 0.66 | 0.508 |
| duration≤9h(n=623) | 0.29 | | -0.04, 0.63 | | | 1.71 | | 0.087 |  | 0.37 | | | 0.02, 0.72 | 2.10 | 0.036 |
| PIF |  | |  | | |  | |  |  |  | | |  |  |  |
| duration>10h(n=206) | Reference group | | | | | | | |  | Reference group | | | | | |
| 9<duration≤10h(n=760) | 0.35 | | -0.26, 0.96 | | | 1.12 | | 0.262 |  | 0.34 | | | -0.33, 1.00 | 1.00 | 0.318 |
| duration≤9h(n=623) | 0.77 | | 0.19, 1.36 | | | 2.61 | | 0.009 |  | 0.75 | | | 0.11, 1.40 | 2.28 | 0.022 |
| SP |  | |  | | |  | |  |  |  | | |  |  |  |
| duration>10h(n=206) | Reference group | | | | | | | |  | Reference group | | | | | |
| 9<duration≤10h(n=760) | 0.16 | | -0.46, 0.79 | | | 0.52 | | 0.604 |  | 0.13 | | | -0.54, 0.80 | 0.37 | 0.708 |
| duration≤9h(n=623) | 0.70 | | 0.09, 1.31 | | | 2.24 | | 0.025 |  | 0.65 | | | 0.03, 1.28 | 2.04 | 0.041 |
| OCD |  | |  | | |  | |  |  |  | | |  |  |  |
| duration>10h(n=206) | Reference group | | | | | | | |  | Reference group | | | | | |
| 9<duration≤10h(n=760) | -0.06 | | -0.47, 0.35 | | | -0.29 | | 0.775 |  | -0.02 | | | -0.43, 0.40 | -0.08 | 0.935 |
| duration≤9h(n=623) | 0.15 | | -0.25, 0.55 | | | 0.72 | | 0.472 |  | 0.20 | | | -0.22, 0.62 | 0.95 | 0.341 |
| GAD |  | |  | | |  | |  |  |  | | |  |  |  |
| duration>10h(n=206) | Reference group | | | | | | | |  | Reference group | | | | | |
| 9<duration≤10h(n=760) | 0.20 | | -0.22, 0.62 | | | 0.94 | | 0.349 |  | 0.22 | | | -0.21, 0.66 | 1.02 | 0.310 |
| duration≤9h(n=623) | 0.50 | | 0.06, 0.95 | | | 2.21 | | 0.027 |  | 0.52 | | | 0.07, 0.98 | 2.25 | 0.024# |

Abbreviations: PAS, preschool anxiety scale; SAD, separation anxiety disorder; PIF, physical injury fears; SP, social phobia; OCD, obsessive-compulsive disorder; GAD, generalized anxiety disorder.

* Adjusted for age(z-score), gender, the only-child status and main caregiver

# Model *P*=0.096; coefficient p-values reported in main table.

Figure S1. Normality of residuals (Q-Q plots)


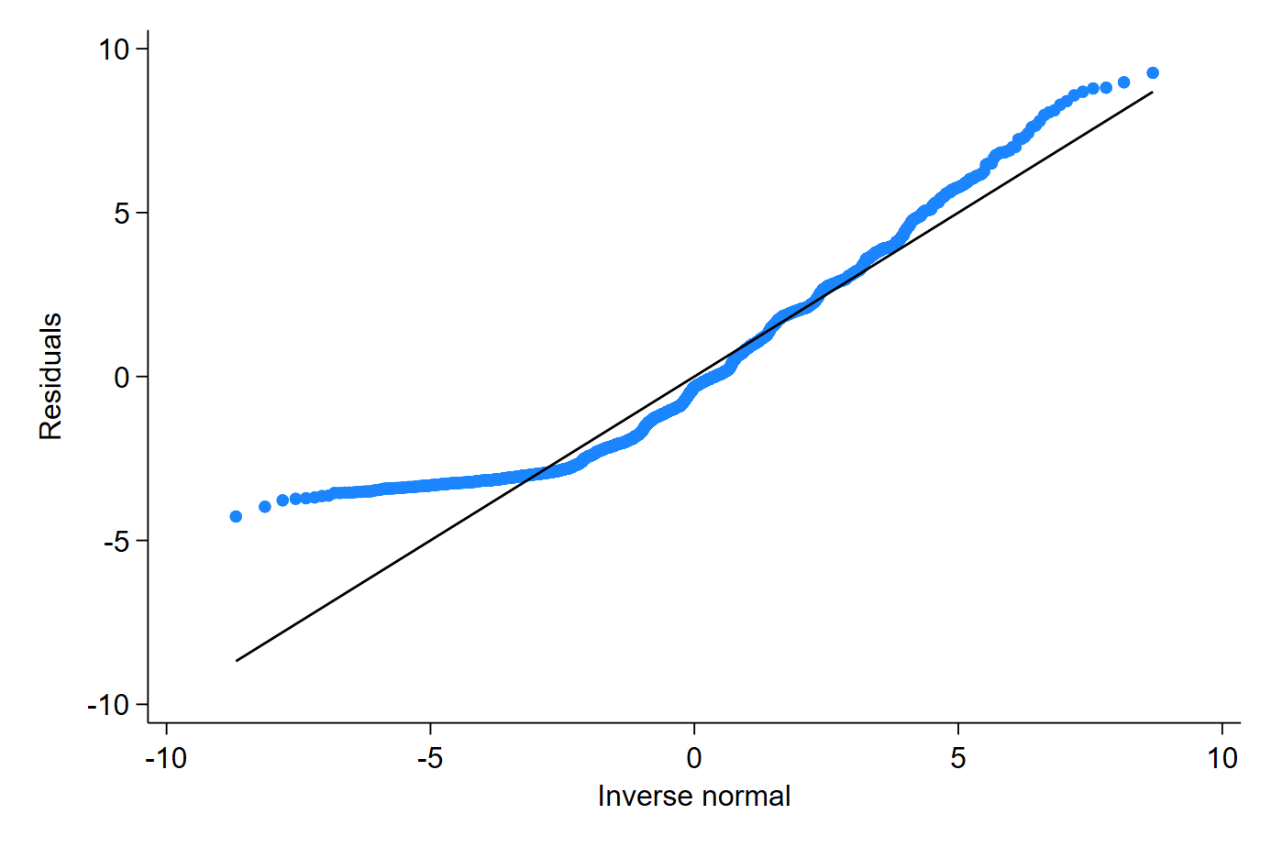


Figure S2. Residual-versus-fitted plots


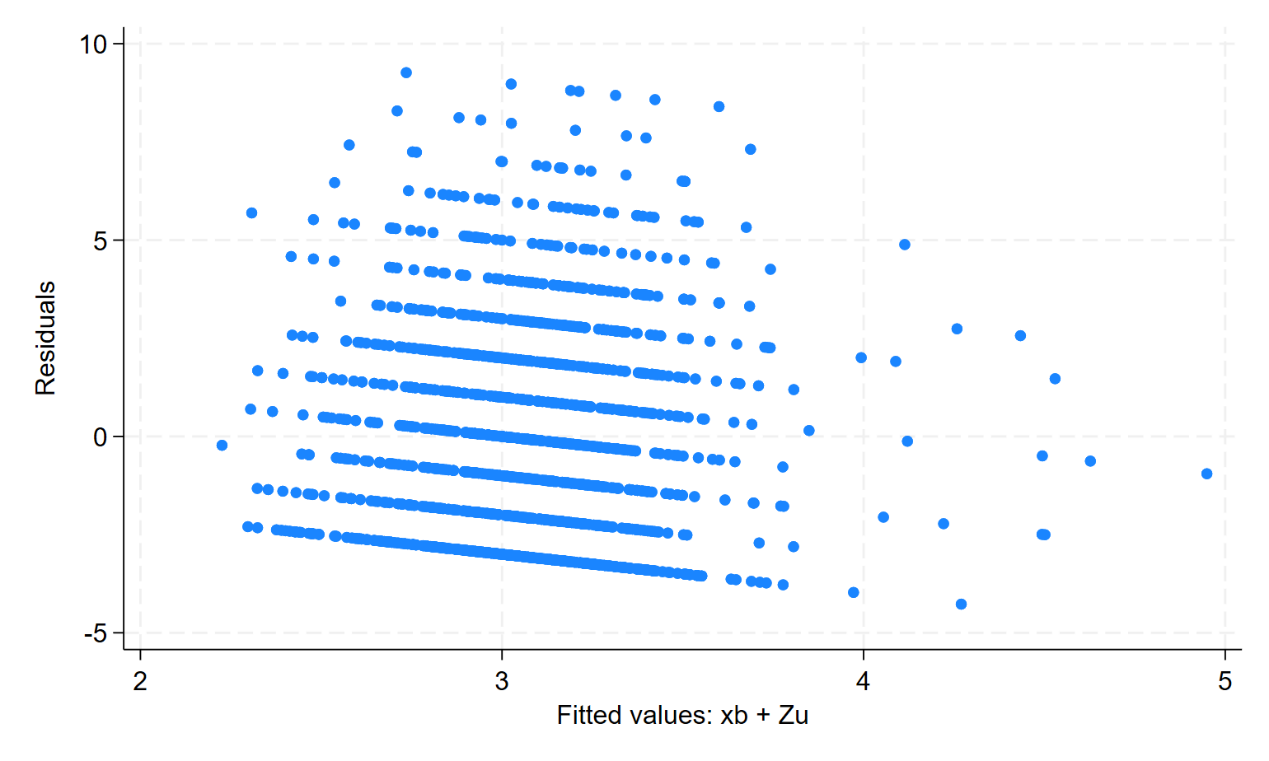


Table S6. Variance Inflation Factor (VIF) detection for all variables.

| Variables | VIF | 1/VIF |
| --- | --- | --- |
| Education_paternal_bachelor’s_degree | 30.92 | 0.032 |
| Education_paternal_master’s_degree_or_above | 26.42 | 0.038 |
| Education_maternal_bachelor’s_degree | 23.70 | 0.042 |
| Education_maternal_master’s_degree_or_above | 18.27 | 0.055 |
| Education_paternal_associate_degree | 15.48 | 0.065 |
| Education_maternal_associate_degree | 14.09 | 0.071 |
| Occupation_paternal_other | 3.62 | 0.276 |
| Occupation_paternal_tech_worker | 3.60 | 0.277 |
| Occupation_maternal_other | 2.68 | 0.373 |
| Occupation_paternal_free_lancer | 2.57 | 0.390 |
| Occupation_maternal_tech_worker | 2.44 | 0.410 |
| Nighttime_sleep_duration_less_than 9_hours | 2.43 | 0.412 |
| Nighttime_sleep_duration_between_9_to 10 hours | 2.41 | 0.415 |
| Occupation_maternal_free_lancer | 1.79 | 0.558 |
| Main_caregiver_parents | 1.11 | 0.903 |
| Main_caregiver_other | 1.05 | 0.953 |
| The_only_child | 1.04 | 0.964 |
| Age(z-score) | 1.03 | 0.971 |
| Gender | 1.01 | 0.987 |
